1 **Interventions to reduce opioid use for patients with chronic non-cancer pain in**  
2 **primary care settings: a systematic review and meta-analysis.**

3 <sup>1</sup>Qian Cai\*, <sup>2</sup>Christos Grigoroglou, <sup>2</sup>Thomas Allen, <sup>3</sup>Teng-Chou Chen, <sup>3</sup>Li-Chia Chen,  
4 <sup>1,4</sup>Evangelos Kontopantelis

5

6 <sup>1</sup> *Division of Informatics, Imaging & Data Sciences, School of Health Sciences,*  
7 *Faculty of Biology, Medicine and Health, Manchester Academic Health Science*  
8 *Centre, University of Manchester, Manchester, the United Kingdom.*

9 <sup>2</sup> *Centre for Health Economics, Division of Population Health, Health Services*  
10 *Research and Primary Care, School of Health Sciences, Faculty of Biology, Medicine*  
11 *and Health, Manchester Academic Health Science Centre, University of Manchester,*  
12 *Manchester, the United Kingdom*

13 <sup>3</sup> *Centre for Pharmacoepidemiology and Drug Safety, Division of Pharmacy and*  
14 *Optometry, School of Health Sciences, Faculty of Biology, Medicine and Health,*  
15 *University of Manchester, Manchester, the United Kingdom.*

16 <sup>4</sup> *National Institute for Health and Care Research (NIHR) School for Primary Care*  
17 *Research, Division of Population Health, Health Services Research and Primary*  
18 *Care, School of Health Sciences, Faculty of Biology, Medicine and Health,*  
19 *Manchester Academic Health Science Centre, University of Manchester, Manchester,*  
20 *the United Kingdom.*

21

22 \*Corresponding author:

23 Qian Cai

24 Division of Informatics, Imaging & Data Sciences, School of Health Sciences, Faculty  
25 of Biology, Medicine, and Health, University of Manchester, Manchester, M13 9PL,  
26 the United Kingdom

27 Phone: (0)7419737634

28 Email: [qian.cai@manchester.ac.uk](mailto:qian.cai@manchester.ac.uk)

29 **Abstract**

30 **Objective:** This systematic review and meta-analysis aimed to assess interventions  
31 to reduce opioid use for patients with chronic non-cancer pain (CNCP) versus usual  
32 care or active controls in primary care settings.

33 **Methods:** In this registered study (PROSPERO: CRD42022338458), we searched  
34 MEDLINE, Embase PsycInfo, CINAHL, and Cochrane Library from inception to  
35 December 28<sup>th</sup> 2021, and updated on Dec 14<sup>th</sup> 2023 for randomized controlled trials  
36 (RCTs) and cohort studies with no restrictions. Methodological quality was assessed  
37 using the Cochrane Risk of Bias tool for RCTs and Newcastle Ottawa Scale for  
38 cohort studies. Primary outcomes included mean reduction in morphine equivalent  
39 daily dose (reported as mean differences [MDs] mg/day; 95% confidence intervals  
40 [95%CIs]) and/or opioid cessation proportion. Secondary outcomes were mean  
41 changes in pain severity (reported as standardized mean difference [SMDs]; 95%CIs)  
42 and (serious) adverse events. Meta-analyses were performed using random-effects  
43 models.

44 **Results:** We identified 3,826 records, of which five RCTs (953 participants) and six  
45 cohort studies (967 participants) were included. Overall, opioid dosage was  
46 significantly reduced in intervention groups compared to controls (MD: -24.88 mg/day,  
47 95%CI: -36.40 to -13.36;  $I^2=59.41\%$ ; nine studies). Subgroup analyses revealed  
48 significant opioid dose reductions with mindfulness (MD: -29.36 mg/day 95%CI: -  
49 40.55 to -18.17;  $I^2=0.0\%$ ; two trials) and CBT-based multimodalities (MD: -41.68  
50 mg/day; 95%CI: -58.47 to -24.89;  $I^2=0.0\%$ ; two cohort studies), respectively,  
51 compared to usual care. No significant differences were observed in opioid cessation  
52 (Odds ratio: 1.55, 95%CI: 0.3 to 2.81,  $I^2=50.79\%$ ; three studies) or pain severity  
53 (SMD: -0.13, 95%CI: -0.37 to 0.11;  $I^2=33.51\%$ ; three trials). Adverse events were  
54 infrequently examined, with withdrawal symptoms commonly reported.

55 **Conclusions:** The studied interventions were effective in reducing opioid dosage for  
56 people with CNCP in primary care. They highlighted the importance of

57 multidisciplinary collaboration. Large-scale RCTs measuring the long-term effects  
58 and cost of these interventions are needed before their implementation.

59

## 60 **Introduction**

61 Opioids are primarily recommended by the World Health Organization pain ladder in  
62 treating acute pain, cancer pain, and palliative care [1]. During the last two decades,  
63 there has been a marked increase in opioid prescriptions issued for chronic non-  
64 cancer pain (CNCP), predominantly in the United States (US) [2], Canada [3], and  
65 several European countries [4-6] including the United Kingdom (UK) [7]. Despite the  
66 widespread utilization of opioids, findings from randomized controlled trials and  
67 systematic reviews suggest limited efficacy of these medications, yielding only  
68 modest effects in pain relief in the short to medium term (less than 12 weeks) [8].  
69 While the evidence supporting the long-term use of opioids remains sparse, the  
70 associated harms of long-term opioid treatment (LTOT), including respiratory  
71 depression, bone fractures, and opioid-related mortality, are well documented [9].  
72 Moreover, prolonged opioid use introduces risks of dependence, addiction, and  
73 abuse [10].

74

75 In response to these concerns, clinical guidelines [11-13] have prompted healthcare  
76 providers (HCPs) to reassess their prescribing practices, emphasizing the need to  
77 reduce opioid use when potential risks outweigh perceived benefits. However, the  
78 endeavor to reduce opioid use encounters significant challenges, including patients'  
79 fear of withdrawal symptoms, inadequate social and healthcare support, and limited  
80 availability of non-opioid methods for pain management [14, 15]. Currently, there is a  
81 lack of guidance and practical support to implement the reduction of LTOT. Therefore,  
82 there is an urgent need for an evidence-based evaluation of interventions to assess  
83 their effectiveness in reducing opioid utilization and evaluate their impact on clinical  
84 outcomes, particularly in primary care settings, where opioids are mostly prescribed.

85

86 Previous systematic reviews [16-19] have provided valuable insights into  
87 interventions aimed at reducing opioid use for chronic pain patients. However, their  
88 inclusion criteria were broad, limiting their relevance to primary care settings. For  
89 example, these reviews analyzed interventions (e.g., spinal cord stimulation) that are  
90 not readily accessible in primary care settings, and they included studies that  
91 evaluated abrupt or gradual opioid tapering protocols without incorporating additional  
92 supportive therapies for patients. The provision of supplementary interventions is  
93 crucial, as patients often express reluctance to reduce or cease opioids when  
94 alternative treatments are not provided, given these medications constitute their  
95 primary method of pain management in real-world practices. Furthermore, the  
96 absence of additional interventions impedes the identification of the key components  
97 contributing to the dose reduction outcomes. Some prior systematic reviews also  
98 included pilot studies lacking clear objectives of opioid reduction. This is particularly  
99 common for studies using pharmacological substitution, where the primary aim was  
100 to address opioid withdrawal symptoms rather than reducing opioid dosage, despite  
101 achieving a decrease in opioid dosage or an improvement in pain severity. In view of  
102 these limitations and the emergence of new studies recently, there is a compelling  
103 need for an updated evaluation of the current evidence.

104

105 The present systematic review and meta-analysis aimed to evaluate the  
106 effectiveness of healthcare provider-directed interventions designed to reduce or  
107 discontinue opioid use for patients with CNCP, with a particular focus on primary care  
108 settings. Specifically, the objectives included comparing changes in morphine  
109 equivalent daily dose (MEDD), evaluating the proportion of patients discontinuing  
110 opioids, and assessing the change in pain severity and adverse events between  
111 interventions and usual care or active controls.

112

113 **Methods**

114 This registered systematic review and meta-analysis (PROSPERO:  
115 CRD42022338458) was conducted following the Cochrane Handbook [20] and the  
116 Preferred Reporting Items for Systematic Reviews and Meta-Analyses (PRISMA)  
117 guidelines (S1 Appendix) [21].

118

119 **Eligibility criteria**

120 Eligible studies were full-scale randomized controlled trials (RCTs) and cohort studies  
121 that examined primary care provider-directed interventions, designed to reduce or  
122 discontinue opioids in adult patients ( $\geq 18$  years) with CNCP (persists for  $\geq 3$  months).  
123 Studies that concurrently used opioids with other analgesics (e.g., non-steroidal anti-  
124 inflammatory drugs) were excluded, as distinguishing the analgesic effects of opioids  
125 from those analgesics were challenging. Interventions implemented in hospital  
126 settings or managed by patient themselves were not considered for inclusion.  
127 Studies that solely focused on reducing opioids without offering patients alternate  
128 treatments or replacements were excluded. Interventions were considered if they  
129 explicitly aiming to reduce or cease opioid use, whereas those with a spillover effect  
130 on opioid use were excluded. Any comparator was accepted, including usual care or  
131 active controls (either pharmacological or non-pharmacological).

132

133 The primary outcomes of interest included: 1) opioid dose reduction, measured by  
134 the mean changes in morphine milligram equivalent daily dose (MEDD) from pre- to  
135 post-treatment. The homogeneity of this outcome measure allowed us to examine  
136 our study objectives meta-analytically; 2) The proportion of participants for whom  
137 opioid use was either ceased or declined. Secondary outcomes included the mean  
138 change in pain severity (measured by pain rating scales on a range of 0-10, where 0  
139 indicating no pain whilst 10 indicating severe pain) and the number of (serious)  
140 adverse events related to opioid reduction. Case reports, cross-sectional studies,

141 case-control studies, pilot studies, reviews or meta-analyses were excluded.

142

### 143 **Data sources and search strategies**

144 We performed comprehensive searches in databases including MEDLINE, EMBASE,  
145 PsycINFO, CINAHL, and Cochrane Central Register of Controlled Trials. Searches  
146 were conducted from the inception of each database until December 28<sup>th</sup> 2021, and  
147 updated on December 14<sup>th</sup> 2023, using structured search strategies (S2 Appendix)  
148 that incorporated text words and medical subject headings related to “chronic pain”,  
149 “opioids”, and “reduce/discontinue/cease/deprescribe”. No language and geographic  
150 restrictions were applied. Ongoing trials or unpublished studies were obtained from  
151 ClinicalTrials.gov. To ensure literature saturation, we manually retrieved additional  
152 studies from the reference lists of included studies and published systematic reviews.

153

### 154 **Study selection**

155 Two review authors (QC and CG) independently screened titles and abstracts of the  
156 retrieved citations against pre-determined inclusion/exclusion criteria. When  
157 necessary, full text of eligible records were reviewed for further eligibility assessment.  
158 Where discrepancies occurred and remained unresolved by discussion, a third party  
159 (EK, TA and LCC) was consulted for adjudication. The inter-rater agreement test  
160 demonstrated a high level of consistency (99.64%) between QC and CG with a  
161 Kappa coefficient equals to 0.7982 ( $p < 0.001$ ).

162

### 163 **Data extraction and quality assessment**

164 Data extraction was undertaken independently by one review author (QC) and  
165 verified by another reviewer (TCC) for accuracy. The study authors were also  
166 contacted by email to request any necessary missing information. The following key  
167 information was extracted:

- 168 • Study: first author, publication year, country, study design, settings.

- 169 • Patient characteristics: age, gender, sample size, pain duration and severity,  
170 opioid use status, comorbidities.
- 171 • Intervention and comparator: key components, mode of administration,  
172 frequency, treatment duration.
- 173 • Outcome: opioid dose, pain severity, adverse events.

174

### 175 **Risk of bias assessment**

176 The methodological quality of all included studies was independently appraised by  
177 QC. For RCTs, the Cochrane's Risk of Bias Tool 2.0 (RoB 2) [22] was employed to  
178 assess the risk of bias, including 1. sequence generation; 2. allocation concealment;  
179 3. masking of participants, staff and outcome assessors; 4. incomplete outcome data;  
180 and 5. selective outcome reporting. For cohort studies, a modified Newcastle-Ottawa  
181 Scale (NOS) [23] was used to evaluate bias risk, focusing on 1. the  
182 representativeness of the exposed cohort; 2. selection of the non-exposed cohort; 3.  
183 ascertainment of exposure; 4. absence of the outcome of interest at the start of the  
184 study; 5. comparable controls; 6. assessment of outcome; 7. sufficient follow-up  
185 length for outcomes to occur; and 8. adequacy of follow-up cohorts. For RCTs, high  
186 quality was defined as minimum 4 domains of low risk. As for cohort studies, the  
187 modified NOS adopted a star rating system. A study was deemed to be of good  
188 quality if it obtained  $\geq 3$  stars in selection domain (1-4),  $\geq 1$  star in comparability  
189 domain (5), and  $\geq 2$  stars in outcome/exposure domain (6-8).

190

### 191 **Data synthesis and analysis**

192 The study characteristics and details of opioid reduction interventions were presented  
193 descriptively. Effect sizes were reported using odds ratios (ORs) with their 95%  
194 confidence intervals (95%CI) for opioid cessation, mean differences (MDs) with  
195 95%CI for opioid dose reduction, and standardized mean differences (SMDs) with  
196 95%CI for pain severity, given the utilization of different scales for this outcome

197 measure. Magnitude of effect was defined as large (SMD > 0.8), medium (SMD 0.5-  
198 0.8), small (SMD 0.2-0.5) or trivial (SMD < 0.2) [24].

199

200 Where between- or within-group SDs were not reported, relevant data such as  
201 sample size, p values, t statistics, standard errors (SEs), or 95% CIs were used to  
202 derive SDs using the formula recommended by the Cochrane Handbook (6.5.2.3) [20]  
203 or the calculator embedded in Review Manager 5.4. Additionally, when outcomes  
204 were assessed at multiple time points during long-term follow-up, data from the last  
205 available time point were employed.

206

207 Heterogeneity was assessed using the  $I^2$  statistics, with values below 50%  
208 suggesting low heterogeneity, 50-75% moderate, above 75% substantial  
209 heterogeneity [25]. Random effects meta-analyses with a non-parametric bootstrap  
210 of DerSimonian Laird (DL) method were conducted for pooling the outcomes of  
211 interest [26, 27] even if  $I^2$  was low. Publication bias regarding the primary outcomes  
212 was not assessed due to the small number of included studies.

213

214 Sensitivity analyses were conducted by sequentially removing one study at a time  
215 and repeating the meta-analysis based on the remaining data to assess whether  
216 pooled estimates were unduly influenced by specific studies. Furthermore,  
217 multivariable random effects meta-regressions were conducted to explore potential  
218 sources of heterogeneity, including patient mean age; gender; study period; sample  
219 size; follow-up time point; intervention type and category. Subgroup analyses were  
220 undertaken based on intervention types, which included mindfulness techniques, and  
221 CBT-based multi-component strategies. All data analyses were conducted with  
222 Stata/MP 17.0.

## 223 **Results**

### 224 **Study selection and patient characteristics**

225 The initial search retrieved 3,826 potentially relevant records, of which 1,126 duplicates  
226 were removed, yielding 2,770 unique records for eligibility assessment. By screening  
227 titles and abstracts against our predefined inclusion/exclusion criteria, 2739 studies  
228 were excluded. Of the remaining 31 records, eleven full-text articles including five RCTs  
229 (953 participants, female 557 [58.4%], mean age: 60.1±13.42) [28-32] and six  
230 retrospective cohort studies (patients 967, female 214 [22.1%], mean age: 54.2±13.52)  
231 [33-38] published between 2016 and 2023 were included in this systematic review and  
232 meta-analysis ([Fig 1. Selection of included studies](#)). All included studies reported the  
233 baseline opioid dosage (mean 87.4±131.8 mg/day), with three [31, 33, 37] indicating  
234 that participants consumed a mean MEDD of >120 mg/day. Most studies did not  
235 specify the exact CNCP conditions, except for one study that explicitly mentioned  
236 chronic musculoskeletal pain [38]. Studies were mainly conducted in the US (n=10),  
237 with one in the UK [30]. Both RCTs and retrospective cohort studies had a small  
238 sample size ranging between 35 and 608 (Table 1).

**Table 1. Characteristics of included studies**

| Author, year and country                  | Study design               | Population                        | interventions                                                                                         | Comparators                | Outcomes of interest assessed                                                                                                  | Quality |
|-------------------------------------------|----------------------------|-----------------------------------|-------------------------------------------------------------------------------------------------------|----------------------------|--------------------------------------------------------------------------------------------------------------------------------|---------|
| <b>Randomized controlled trials (n=5)</b> |                            |                                   |                                                                                                       |                            |                                                                                                                                |         |
| Sandhu <i>et al.</i> 2023 [30], UK        | Non-blind, two-arm, RCT    | CNCP (n=608)<br>female 362 (60%)  | Skill-based learning integrating education and mindfulness (n=305)                                    | Usual care (n=303)         | <ul style="list-style-type: none"> <li>• Opioid cessation</li> <li>• Pain severity</li> <li>• Adverse events</li> </ul>        | Good    |
| Wartko <i>et al.</i> 2023 [32], USA       | Non-blind, two-arm, RCT    | CNCP (n=153)<br>female 98 (64%)   | CBT-based pain coping skills training, education and usual care (n=79)                                | Usual care (n=74)          | <ul style="list-style-type: none"> <li>• Opioid dose reduction</li> <li>• Pain severity</li> <li>• Adverse events</li> </ul>   | Good    |
| Hudak <i>et al.</i> 2021 [29], USA        | Non-blind, two-arm, RCT    | CNCP (n=62)<br>female 9 (14.5%)   | The MORE protocol: Mindfulness (n=34)                                                                 | The supportive care (n=28) | <ul style="list-style-type: none"> <li>• Opioid dose reduction</li> </ul>                                                      | Good    |
| Garland <i>et al.</i> 2020 [28], USA      | Non-blind, two-arm, RCT    | CNCP (n=95)<br>female 63 (66.3%)  | The MORE protocol: Mindfulness (n=50)                                                                 | The supportive care (n=45) | <ul style="list-style-type: none"> <li>• Opioid dose reduction</li> </ul>                                                      | Fair    |
| Sullivan <i>et al.</i> 2017 [31], USA     | Non-blind, two-arm, RCT    | CNCP (n=35)<br>female 25 (71.4%)  | CBT-based multimodality & self-care & pain education (n=18)                                           | Standard of care (n=17)    | <ul style="list-style-type: none"> <li>• Opioid dose reduction</li> <li>• Opioid cessation</li> <li>• Pain severity</li> </ul> | Fair    |
| <b>Cohort studies (n=6)</b>               |                            |                                   |                                                                                                       |                            |                                                                                                                                |         |
| Montgomery <i>et al.</i> 2020 [35], USA   | Retrospective cohort study | CNCP (n=47)<br>female 5 (10.6%)   | Acupuncture (n=24)                                                                                    | Standard of care (n=23)    | <ul style="list-style-type: none"> <li>• Opioid dose reduction</li> <li>• Pain severity</li> </ul>                             | Poor    |
| Seal <i>et al.</i> 2019 [37], USA         | Retrospective cohort study | CNCP (n=294)<br>female 30 (10.2%) | Integrated multimodality including CBT, mindfulness, pain education, acupuncture and exercise (n=147) | Standard of care (n=147)   | <ul style="list-style-type: none"> <li>• Opioid dose reduction</li> </ul>                                                      | Good    |
| Oldfield <i>et al.</i> 2018 [36], USA     | Retrospective cohort study | CNCP (n=105)<br>female 7 (6.7%)   | Multimodality integrating CBT, exercise, and acupuncture (n=66)                                       | Standard of care (n=39)    | <ul style="list-style-type: none"> <li>• Opioid dose reduction</li> </ul>                                                      | Good    |
| Goodman <i>et al.</i> 2018 [33], USA      | Retrospective cohort study | CNCP (n=41)<br>female 22 (53.7%)  | Opioid reduction program & consultation with GPs (n=27)                                               | Usual care (n=14)          | <ul style="list-style-type: none"> <li>• Opioid dose reduction</li> </ul>                                                      | Fair    |

| Author, year and country                  | Study design               | Population                         | interventions                               | Comparators              | Outcomes of interest assessed                                                                                                  | Quality |
|-------------------------------------------|----------------------------|------------------------------------|---------------------------------------------|--------------------------|--------------------------------------------------------------------------------------------------------------------------------|---------|
| Vigil <i>et al.</i> 2017 [38], USA        | Retrospective cohort study | CMSK (n=66)<br>female 26 (39.4%)   | Medical cannabis & patient education (n=37) | Patient education (n=29) | <ul style="list-style-type: none"> <li>• Opioid dose reduction</li> <li>• Opioid cessation</li> <li>• Pain severity</li> </ul> | Fair    |
| Mehl-Madrone <i>et al.</i> 2016 [34], USA | Retrospective cohort study | CNCP (n=414)<br>female 124 (59.9%) | Medical care and physical exercise (n=207)  | Standard of care (n=207) | <ul style="list-style-type: none"> <li>• Opioid dose reduction</li> </ul>                                                      | Good    |

240 Note: CNCP=Chronic Non-Cancer Pain, CMSK=Chronic Musculoskeletal Pain, MORE=Mindfulness-Oriented Recovery Enhancement, CBT=Cognitive Behavioral Therapy,  
 241 GPs=general practitioner

242 **Characteristics of interventions**

243 The components, duration, frequency, and delivery mode of the interventions varied  
244 significantly across studies. One study used medicine substitution approach,  
245 transitioning opioids to cannabis [38]; Two studies focused on physical interventions,  
246 incorporating components such as yoga, Taichi, chiropractic therapy [34] and  
247 acupuncture [35]; Five studies involved psychological or behavioral changes,  
248 integrating key components such as cognitive behavior therapy (CBT), mindfulness  
249 techniques, patient education and pain coping skills training [28-30, 32, 33]; Three  
250 studies [31, 36, 37] employed mixed multimodal approaches delivered by a  
251 multidisciplinary team comprising physicians, nurses, psychologists, pharmacists, and  
252 social workers. These multimodal care programs typically combined CBT, mindfulness,  
253 acupuncture, chiropractic care, exercise, pharmacotherapies are the core components.

254

255 The most common comparator was usual care, with the exception of one study that  
256 used patient education as the comparison group [38]. Treatment durations ranged from  
257 eight weeks to 12 months. Follow-up periods (median 6 months) varied from short ( $\leq 3$   
258 months) [28, 29] to intermediate (6-9 months) [31, 33-37], with three studies reporting  
259 long-term outcomes of opioid reduction ( $\geq 12$  months) . (See Table 2 for characteristics  
260 of interventions).

**Table 2. The components and implementation procedures of each intervention**

| Studies                                               | Interventions                                                                                                                                                                                                                                | Duration   | Implemented by                                                              |
|-------------------------------------------------------|----------------------------------------------------------------------------------------------------------------------------------------------------------------------------------------------------------------------------------------------|------------|-----------------------------------------------------------------------------|
| <b>Pharmacological substitution (n=1)</b>             |                                                                                                                                                                                                                                              |            |                                                                             |
| Vigil <i>et al.</i> 2017 [38]                         | Medical cannabis & patient education                                                                                                                                                                                                         | 21 months  | Physicians                                                                  |
| <b>Physical procedure (n=2)</b>                       |                                                                                                                                                                                                                                              |            |                                                                             |
| Montgomery <i>et al.</i> 2020 [35]                    | Battlefield Acupuncture: 5-point auricular acupuncture procedure implemented                                                                                                                                                                 | 9 months   | Physicians                                                                  |
| Mehl-Madrone <i>et al.</i> 2016 [34]                  | Twice monthly GMV (12 sessions) & weekly physical activity (yoga, exercise class, chiropractic therapy, osteopathic treatment, tai chi, or qigong)                                                                                           | 6 months   | Family doctor, nurse, and behavioral health specialist                      |
| <b>Psychological or behavioral intervention (n=5)</b> |                                                                                                                                                                                                                                              |            |                                                                             |
| Sandhu <i>et al.</i> 2023 [30]                        | Weekly skill-based learning and education including mindfulness, relaxation, opioid education, consultation and followed by an opioid taper (weekly 10% reduction)                                                                           | 12 months  | Nurse                                                                       |
| Wartko <i>et al.</i> 2023 [32]                        | CBT-based pain coping skill training: 18 sessions (30 min for each on average), mainly including pain education, goal setting, relaxation skills and motivational interviews, conducted over one year.                                       | 12 months  | Primary care provider, nurse, physician assistant                           |
| Hudak <i>et al.</i> 2021 [29]                         | The MORE protocol: 2-hour weekly training sessions in mindfulness, reappraisal and savoring pleasant events & a 15-min CD-guided mindfulness practice at home and 3-minute breathing before taking opioids                                   | 4 months   | Clinical social workers                                                     |
| Garland <i>et al.</i> 2020 [28]                       | The MORE protocol: 2-hour weekly training sessions in mindfulness, reappraisal and savoring pleasant events & a 15-min CD-guided mindfulness practice at home and 3-minute breathing before taking opioids                                   | 3 months   | Clinical social workers                                                     |
| Goodman <i>et al.</i> 2018 [33]                       | Family physician-patient's discussion of pain management guidelines and practice followed by an opioid tapering program (weekly 10% reduction to 25%-50% reduction every few days)                                                           | 6 months   | Family physician                                                            |
| <b>Multimodalities (n=3)</b>                          |                                                                                                                                                                                                                                              |            |                                                                             |
| Sullivan <i>et al.</i> 2017 [31]                      | A weekly 10% reduction of the initial dose until 30% was reached. Then, a 10% was recalculated based on this dose and then proceeded by 10% of this new dose per week.) & 17 weekly 30-min consultations, CBT-modelled pain self-management, | 8.5 months | Pain medicine/psychiatry physicians, psychologists and physician assistants |

| Studies                          | Interventions                                                                                                                                                                             | Duration | Implemented by                                                                       |
|----------------------------------|-------------------------------------------------------------------------------------------------------------------------------------------------------------------------------------------|----------|--------------------------------------------------------------------------------------|
|                                  | education & a book/CD-guided home practice                                                                                                                                                |          |                                                                                      |
| Oldfield <i>et al.</i> 2018 [36] | Multidisciplinary ORC program including pharmacotherapy, CBT and other modalities (e.g., acupuncture, chiropractic, and yoga)                                                             | 6 months | Physicians, pain specialists, pain psychologists and chemical dependency counsellors |
| Seal <i>et al.</i> 2019 [37]     | Integrated Pain Team: an initial 60-min's biopsychosocial model of pain management (including CBT, mindfulness, acupuncture, chiropractic care, and exercise) & a 30-min follow-up visits | 6 months | Medical provider, psychologist, and pharmacist                                       |

262 Note: MORE=Mindfulness-Oriented Recovery Enhancement, CBT=Cognitive Behavioral Therapy, ORC=Opioid Reassessment Clinic, GMV=Group Medical Visits

263 **Risk of bias assessment**

264 The Cochrane RoB-2 assessment indicated an overall risk of bias being low (n=3) to  
265 moderate (n=2) (Fig 2. Risk of Bias of included RCTs). Due to the impossibility of  
266 masking the interventions, participants and researchers were unblinded, which  
267 increased risk. The high dropout rate during follow-ups was another main reason  
268 contributing to the increased risk of bias. The NOS evaluation tool identified three  
269 cohort studies [34, 36, 37] with good quality, two [33, 38] with fair and one [35] with  
270 poor quality (Table 3). Uncontrolled confounders and limited representativeness of  
271 the study population were the main reasons that reduced the quality of these studies.

272

273 **Table 3. Quality assessment outcomes of cohort studies**

| Author and year                      | Three domains of the Newcastle-Ottawa Scale |                               |          | Quality |
|--------------------------------------|---------------------------------------------|-------------------------------|----------|---------|
|                                      | Selection of participants                   | Comparability of study groups | Outcomes |         |
| Montgomery <i>et al.</i> 2020 [35]   | ★★★                                         | ★                             | ★        | Poor    |
| Seal <i>et al.</i> 2019 [37]         | ★★★★                                        | ★★                            | ★★★      | Good    |
| Oldfield <i>et al.</i> 2018 [36]     | ★★★                                         | ★★                            | ★★★      | Good    |
| Goodman <i>et al.</i> 2018 [33]      | ★★★                                         | ★                             | ★★       | Fair    |
| Vigil <i>et al.</i> 2017 [38]        | ★★★                                         | ★                             | ★★       | Fair    |
| Mehi-Madrone <i>et al.</i> 2016 [34] | ★★★                                         | ★★                            | ★★★      | Good    |

## 274 **Opioid dose reduction**

275 Ten studies including four RCTs [28, 29, 31, 32] and six cohort studies [33-38] reported  
276 the outcomes of opioid dose reduction. Opioid dosage was significantly decreased in  
277 the intervention groups compared to controls (MD: -31.80 mg/day, 95%CI: -50.30 to -  
278 13.31; ten studies; [Fig 3. Forest plot of interventions vs controls in opioid dose  
279 reduction in ten studies](#)). However, considerable heterogeneity was noted ( $I^2 = 91.14\%$ ,  
280 95%CI: 80.4% to 96.0%,  $p=0.00$ ; [Fig 3](#)). A sensitivity analysis was conducted to  
281 investigate the source of heterogeneity and the Mehl-Madrone et al. (2016)'s study [34]  
282 was identified as an outlier ([Fig 4. Sensitivity analysis of included studies](#)). Upon its  
283 removal, the heterogeneity decreased from high ( $I^2 = 91.14\%$ ) to medium ( $I^2 =$   
284 59.41%), but the significance or direction of the pooled effects in our meta-analyses  
285 remained unchanged (MD: -24.88 mg; 95%CI: -36.40 to -13.36; nine studies; [Fig 5.  
286 Forest plot of interventions vs controls in opioid dose reduction in nine studies](#)).  
287 Furthermore, a multivariable meta-regression analysis was conducted, revealing that  
288 heterogeneity could be partially explained by differences in the longest follow-up time  
289 across studies ( $p=0.014$ ).

290

291 Within the four RCTs [28, 29, 31, 32] provided data that enabled the pooled calculation  
292 of change for opioid reduction among 181 participants receiving different interventions  
293 compared to 162 receiving usual care (MD: -24.40 mg; 95%CI: -36.32 to -12.47;  $I^2 =$   
294 9.21%,  $p=0.35$ ; [Fig 6. Forest plot of interventions vs controls in opioid dose reduction in  
295 four RCTs](#)), a subgroup meta-analysis of two trials [28, 29] using the MORE protocol  
296 (mindfulness) found a significant reduction in opioid dosage in 84 patients receiving this  
297 intervention, compared to 77 having supportive care (MD: -29.36 mg; 95%CI: -40.55 to  
298 -18.17;  $I^2 = 0.00\%$ ,  $p=0.37$ ; [Fig 6](#)). Similar decreases in opioid dose were reported by  
299 Wartko et al. (2023) [32] and Sullivan et al. (2017) [31] using CBT-based multi-  
300 component interventions. However, no between-group statistical significance was  
301 attained (MD: -10.10 mg; 95%CI: -33.61 to 13.40;  $I^2 = 0.00\%$ ,  $p=0.52$ ; [Fig 6](#)).

302

303 Within the six cohort studies [33-38], where various interventions were implemented, a  
304 significant decrease in the use of opioid medications was observed in the intervention  
305 groups (MD: -29.89 mg; 95%CI: -49.00 to -10.78;  $I^2 = 72.72\%$ ,  $p=0.01$ ; [Fig 7. Forest  
306 plot of interventions vs controls in opioid dose reduction in five cohort studies](#)).  
307 Subgroup analysis of Oldfield et al. (2018) and Seal et al. (2021) using CBT-based  
308 interventions showed a significant reduction in opioid dose, compared to those in the  
309 control group. (MD: -41.68 mg; 95%CI: -58.47 to -24.89;  $I^2 = 0.00\%$ ,  $p=0.76$ ; [Fig 7](#)).

310

### 311 **Opioid cessation**

312 No significant differences were observed in opioid cessation (Odds ratio: 1.55, 95%CI:  
313 0.3 to 2.81;  $I^2=50.79\%$ ,  $p=0.13$ ; three studies; [Fig 8. Forest plot of interventions vs  
314 controls in opioid cessation](#)) between intervention groups and controls. In the two RCTs  
315 [30, 31], although the interventions had slight variations, both studies implemented a  
316 weekly 10% dose reduction protocol combined with education and consultation as core  
317 components of the interventions. In the Sandhu et al. (2023) study [30], patients  
318 undergoing skill-based learning and education had a significantly higher cessation rate  
319 than those receiving usual care (Odds ratio [OR]: 5.23; 95% CI 2.87 to 9.52; [Fig 8](#)).  
320 However, pooled meta-analysis showed no statistically significant change in opioid  
321 discontinuation (OR: 1.10; 95%CI -0.48 to 2.67; [Fig 8](#)). Moderate heterogeneity  
322 ( $I^2=58.59\%$ , 95% CI 0% to 86.2%) was observed, primarily attributed to the small  
323 sample size of the Sullivan et al. (2017) study [31].

324

325 In the cohort study [38] reporting opioid cessation, where 37 patients received  
326 cannabis-assisted opioid replacement along with patient education. Among them, 15  
327 patients completely discontinued the opioid use over a period of 21 months. When  
328 compared to a control group receiving education alone, the cessation rate of opioid  
329 was lower in the control group, with only 1 out of 29 patients achieving opioid cessation;

330 however, this difference was not statistically significant, primarily because of the very  
331 small sample size (OR: 2.95, 95% CI 0.85 to 5.05; [Fig 8](#)).

332

### 333 **Pain severity**

334 Pain severity changes at different observation time points were reported in three trials  
335 [30-32], all utilizing interventions grounded in behavior change and patient education.

336 Due to the variations in pain severity measurements across studies, standard mean  
337 differences were used for pooling the estimates. While a decrease in pain severity was  
338 observed in all three trials, the between-group difference was small and non-significant  
339 (SMD -0.13; 95% CI -0.37 to 0.11,  $I^2 = 33.51%$ ,  $p=0.22$ ; [Fig 9. Forest plot of](#)  
340 [interventions vs controls in pain severity improvement](#)). It is worth noting that this 0.13-  
341 point reduction in pain score might not have meaningful clinical implications.

342

343 Due to the poor study quality and high heterogeneity, meta-analysis was not feasible  
344 for two cohort studies [35, 38] reporting the outcome of pain severity. Therefore, the  
345 results were narratively reviewed. Compared with these behavioral, psychological and  
346 physical interventions, the pharmacological intervention (cannabis) combined with  
347 patient education, as used in the Vigil et al. (2017) study [38], showed a significant  
348 decrease in pain intensity score (MD: -3.4 on a scale of 0-10,  $p<0.001$ ), which  
349 suggested a meaningful clinical implication. Acupuncture, as employed in the  
350 Montgomery et al. (2020) study [35], exhibited an immediate effect in alleviating pain  
351 (a reduction in pain intensity score of MD 1.3 on a scale of 0-10,  $p<0.01$ ). However,  
352 there were no significant differences after 9 months ( $p = 0.15$ ), indicating acupuncture's  
353 short-term effects.

354

### 355 **Adverse events**

356 Adverse events (AEs) were infrequently examined in included studies, with the majority  
357 of reported AEs being associated with psychological and nervous system effects. In

358 Wartko et al. (2023)'s study [32], which involved 79 participants receiving CBT-based  
359 pain coping skills training plus usual care, six cases of increased pain, one case of  
360 withdrawal symptoms, and one case of anxiety were noted. No serious adverse events  
361 (SAEs) were documented in this study. In Sandhu et al. (2023) [30], adverse events  
362 such as sleep disturbance, suicidal ideation, headache, withdrawal symptoms were  
363 reported by 22 of 305 participants (7%) and 8 of 303 participants (3%), in the  
364 intervention and usual care groups, respectively. SAEs occurred in 8% (25/305) of the  
365 participants in the intervention group and 5% (16/303) in the usual care group, with the  
366 most common SAEs being gastrointestinal disorder, metastatic cancer, hospitalization  
367 due to increased pain, and unknown cause of death.

368

## 369 **Discussion**

### 370 **Summary of main findings**

371 In this systematic review and meta-analysis, we examined 11 studies (five RCTs and  
372 six cohort studies) assessing the effectiveness of opioid reduction interventions for  
373 patients with CNCP in primary healthcare settings. Despite methodological differences,  
374 both RCTs and observational studies yielded statistically similar results, allowing for the  
375 pooling of results across the full range of eligible studies. Overall, intervention groups  
376 exhibited significant reductions in opioid dosage compared to usual care or active  
377 control. Subgroup analyses revealed significant opioid dose reductions with  
378 mindfulness and CBT-based multimodalities, respectively, compared to usual care. No  
379 significant differences were observed in opioid cessation or pain severity. Adverse  
380 events were infrequently examined, with withdrawal symptoms commonly reported.  
381 Medium heterogeneity was observed across all studies for each outcome, likely  
382 stemming from variability in interventions, follow-up durations, and healthcare providers  
383 involved. Nevertheless, the  $I^2$  values for subgroup analyses were low.

384

### 385 **Compare with existing literature**

386 Our study conclusion generally aligns with previous systematic reviews [16-19] that the  
387 strength of evidence was insufficient to draw conclusions. However, our study extends  
388 these reviews by providing an updated and comprehensive assessment of the literature,  
389 adding one recent good-quality RCT. Supported by subgroup meta-analyses, we  
390 elucidated the effectiveness of mindfulness in reducing LTOT. Meanwhile, we  
391 highlighted key components such as CBT, patient education, mindfulness, exercise,  
392 which may contribute to the successful opioid reduction and thus merit consideration  
393 for future intervention development. Importantly, our study exclusively targeted primary  
394 care settings, distinguishing it from others that included secondary and tertiary care  
395 settings. Although de Kleijn et al. (2021) [17] solely focused on primary care settings,  
396 their results were narratively synthesized, and they included studies using simple  
397 opioid tapering protocols or interventions targeted at physicians.

398

399 Clinical guidelines [11, 12] recommend an initial reduction of opioid dosage by 10% per  
400 week, with adjustments for high-dose users (> MEDD 120 mg/day) or those on LTOT  
401 exceeding one year [39]. In our study, we observed a pooled mean opioid reduction of  
402 24.88 mg/day from a baseline of 87.4 mg/day. Although this reduction was aggressive  
403 and exceeded the guideline-recommended reduction rate, it did yield a clinically  
404 meaningful decrease in opioid dosage without worsening pain severity. It is important to  
405 acknowledge that adherence to guideline recommendations does not necessarily  
406 guarantee optimal patient outcomes, as individual responses to opioid reduction  
407 strategies may vary. In fact, the primary goal of CNCP management is to maintain body  
408 function rather than achieve complete pain eradication. Therefore, efforts should  
409 prioritize reducing opioids to minimize potential harms associated with LTOT.  
410 Meanwhile, despite limited examination of adverse events in this study, our findings  
411 align with existing evidence [40, 41], suggesting that opioid reduction may lead to  
412 withdrawal symptoms, increased pain severity, suicides or all-cause mortality.

413 Therefore, close monitoring of patient responses to opioid reduction strategies is  
414 essential for optimizing treatment outcomes while mitigating adverse effects.

415

416 Our findings highlighted the effectiveness of the MORE protocol, with mindfulness as  
417 its core component, in reducing opioid dose for CNCP patients in the short term (3  
418 months). Additionally, meta-analytic results indicated a significant and strong  
419 association between mindfulness and pain reduction [42]. In another study [43]  
420 conducted by the same author using the MORE protocol, participants reported  
421 significantly greater improvements in psychological and physical function outcomes  
422 (e.g., general activity, mood, walking ability, normal work, relationships, sleep, and  
423 enjoyment of life.) compared to the support group during the three-month follow-up  
424 period. In view of this evidence, mindfulness could be considered a potential  
425 component in the development of opioid reduction strategies. However, before  
426 recommending widespread implementation of this intervention, further validation  
427 through replication in a second trial with a longer observation period ( $\geq 12$  months)  
428 within primary care settings is necessary.

429

430 Contrary to expectations, CBT-based interventions did not show a significant reduction  
431 in opioid dosage in RCTs [31, 32]. This finding aligns with recent evidence from a  
432 recent cluster RCT, indicating that although CBT significantly reduced pain severity, it  
433 did not result in significant differences in opioid use between groups [43]. The reason  
434 for this non-significant result may be twofold. First, the small sample size and variations  
435 in interventions across studies may have contributed to the lack of statistical  
436 significance. Second, the study conducted by Sullivan et al. (2017) [31] involved high-  
437 dose users ( $207 \pm 245$  mg/day), suggesting that behavior changes might not be superior  
438 to usual care in reducing opioids dosage for this population. However, the pain relief  
439 achieved through CBT may contribute to a subsequent decrease in opioid utilization,  
440 although this effect may take time to manifest. Two observational studies [36, 37]

441 employing similar CBT-based interventions reported significant reductions in opioid  
442 dosage compared to usual care. This inconsistency with findings from RCTs may be  
443 attributed to the variations in interventions. Additionally, observational studies may yield  
444 more promising results due to unadjusted confounders. Further investigation with long-  
445 term follow-up and larger sample sizes is warranted to elucidate the effects of CBT on  
446 opioid reduction.

447

448 Pharmacological interventions (cannabis-assisted opioid substitution) showed  
449 promising result, with a higher rate of opioid cessation and improved pain severity  
450 observed among the study population. This could be explained by the fact that patients  
451 often perceive pharmacotherapies as providing immediate pain relief, contrasting with  
452 non-pharmacological approaches which may require more time to yield noticeable  
453 effects. Consequently, patients may be more inclined towards pharmacological  
454 treatments, especially during episodes of exacerbated pain. This preference may be  
455 influenced by patients' desire to promptly alleviate pain [44], and the challenges  
456 associated with accessing non-pharmacological therapies [45], which further  
457 perpetuates the reliance on pharmacotherapy in managing CNCP symptoms. While  
458 cannabis demonstrates efficacy in replacing opioids for CNCP management, its long-  
459 term use may pose potential risks, including lower educational achievement,  
460 psychiatric illness, and residual cognitive impairment [46]. Therefore, careful  
461 consideration and monitoring are necessary when utilizing cannabis as a substitute for  
462 opioids in CNCP management.

463

464 Current clinical guidelines from the UK NICE (National Institute for Health and Care  
465 Excellence) [13, 47] and NHS Oxford Hospital [12] advocate for a holistic approach  
466 beyond pharmacotherapy alone. Our research findings align with these  
467 recommendations, revealing that a combination of cognitive change strategies,  
468 acupuncture, exercise, patient education and pharmacotherapies, delivered by a

469 multidisciplinary team were more effective in opioid reduction. Central to this success is  
470 the practice of shared decision making between patient and healthcare professionals.  
471 The collaboration among diverse healthcare professionals (GPs, nurses, therapists,  
472 pharmacists, etc) is crucial, as each contributes unique expertise and insights to the  
473 table. Nevertheless, challenges remain in accessing to multimodal cares, particularly  
474 for individuals unable to take time off work, those residing in regions with limited  
475 services, and individuals from culturally and linguistically diverse communities.  
476 Addressing these access barriers is essential to ensuring equitable healthcare delivery.

477

#### 478 **Strengths and limitations**

479 To our knowledge, this is the first and most up-to-date systematic review and meta-  
480 analysis, to evaluate the effectiveness of interventions on opioid dose reduction and  
481 pain outcomes for patients with CNCP, with a particular emphasis on primary  
482 healthcare settings. By conducting a comprehensive literature search and including  
483 recently conducted studies in the UK, this research holds informative value for the  
484 potential implementation of interventions outside the US primary care settings.  
485 Moreover, several key subgroup analyses were conducted to identify which intervention  
486 (components) are effective in achieving opioid reduction purpose.

487

488 Our study also had several limitations. First, the relatively small number of included  
489 participants, short follow-up periods, and lack of blinding to interventions may have  
490 introduced biases and impacted the overall quality of the included studies. Second,  
491 data in observational studies were sourced from secondary databases or electronic  
492 medical records, which could cause information bias. Third, funnel plots and the  
493 Egger's test were not performed due to the small number of studies included in the  
494 meta-analyses Fourth, the majority of the studies were conducted on white populations  
495 in the US, likely influenced by the opioid crisis in that country, thus limited the  
496 generalizability of our research findings to other ethnicities and regions. Lastly, data

497 was insufficient to support meta-analyses of quality of life or function.

498

#### 499 **Conclusion**

500 Although according to prior studies, no specific interventions can be recommended  
501 over one another, multidisciplinary opioid reduction strategies, incorporating  
502 components such as CBT, pain education, mindfulness, exercise and acupuncture,  
503 have demonstrated effectiveness and tolerability in reducing opioid doses and  
504 improving pain severity among patients with CNCP in primary care settings. However,  
505 robust evidence remains limited due to several factors, including a shortage of well-  
506 designed research studies, inadequate long-term follow-up periods and absence of  
507 QoL-related outcomes. Future studies should prioritize investigating the active  
508 components within these interventions to gain a deeper understanding of the specific  
509 strategies contributing to positive outcomes. Additionally, it is essential to assess the  
510 cost-effectiveness and patient acceptability of these interventions before their  
511 implementation in specific primary care contexts.

512

#### 513 **Acknowledgments**

514 None.

515

#### 516 **Contributors**

517 Conceptualization: LCC, EK, QC, TCC.

518 Data curation: QC, CG, TCC, EK.

519 Formal analysis: QC, EK.

520 Investigation: QC, CG, TCC.

521 Methodology: QC, EK.

522 Project administration: QC.

523 Supervision: EK TA CG LCC.

524 Validation: CG TCC.

525 Visualization: QC.

526 Writing – original draft: QC.

527 Writing – review & editing: QC CG TA TCC LCC EK.

528

529 **Funding source**

530 None.

## References

1. Anekar, A.A. and M. Cascella, *WHO analgesic ladder*. 2020.
2. Boudreau, D., et al., *Trends in long-term opioid therapy for chronic non-cancer pain*. *Pharmacoepidemiology and drug safety*, 2009. **18**(12): p. 1166-1175.
3. Smolina, K., et al., *Patterns and trends in long-term opioid use for non-cancer pain in British Columbia, 2005–2012*. *Canadian Journal of Public Health*, 2016. **107**: p. e404-e409.
4. Werber, A., et al., *Opioid therapy in the treatment of chronic pain conditions in Germany*. *Pain Physician*, 2015. **18**(3): p. E323.
5. Kalkman, G., et al., *Practice variation in opioid prescribing for non-cancer pain in Dutch primary care: A retrospective database study*. *Plos one*, 2023. **18**(2): p. e0282222.
6. Hansen, C.A., et al., *Epidemiological Factors Associated with Prescription of Opioids for Chronic Non-Cancer Pain in Adults: A Country-Wide, Registry-Based Study in Denmark Spans 2004–2018*. *Journal of Pain Research*, 2023: p. 463-485.
7. Jani, M., et al., *Time trends and prescribing patterns of opioid drugs in UK primary care patients with non-cancer pain: a retrospective cohort study*. *PLoS Medicine*, 2020. **17**(10): p. e1003270.
8. Busse, J.W., et al., *Opioids for chronic noncancer pain: a systematic review and meta-analysis*. *Jama*, 2018. **320**(23): p. 2448-2460.
9. Gomes, T., et al., *The burden of opioid-related mortality in the United States*. *JAMA network open*, 2018. **1**(2): p. e180217-e180217.
10. Edlund, M.J., et al., *Risks for opioid abuse and dependence among recipients of chronic opioid therapy: results from the TROUP study*. *Drug and alcohol dependence*, 2010. **112**(1-2): p. 90-98.
11. Dowell, D., T.M. Haegerich, and R. Chou, *CDC guideline for prescribing opioids for chronic pain—United States, 2016*. *Jama*, 2016. **315**(15): p. 1624-1645.
12. NHS Oxford University Hospital. *Guidance for opioid reduction in primary care*. <https://www.ouh.nhs.uk/services/referrals/pain/documents/gp-guidance-opioid-reduction.pdf> [Accessed on 04 Feb 2024].
13. NICE. *Chronic Pain, management*. 2021. Available from: <https://cks.nice.org.uk/topics/chronic-pain/management/management/>. [cited on Feb 7th 2024].
14. Cross, A.J., et al., *Barriers and enablers to monitoring and deprescribing opioid analgesics for chronic non-cancer pain: a systematic review with qualitative evidence synthesis using the Theoretical Domains Framework*. *BMJ Quality & Safety*, 2022. **31**(5): p. 387-400.
15. Frank, J.W., et al., *Patients' perspectives on tapering of chronic opioid therapy: a qualitative study*. *Pain medicine*, 2016. **17**(10): p. 1838-1847.
16. Avery, N., et al., *Efficacy of interventions to reduce long term opioid treatment for chronic non-cancer pain: systematic review and meta-analysis*. *Bmj*, 2022. **377**.
17. de Kleijn, L., et al., *Opioid reduction for patients with chronic pain in primary care: systematic review*. *British Journal of General Practice*, 2022.
18. Frank, J.W., et al., *Patient outcomes in dose reduction or discontinuation of long-term opioid therapy: a systematic review*. *Annals of internal medicine*, 2017. **167**(3): p. 181-191.
19. Mathieson, S., et al., *Deprescribing opioids in chronic non-cancer pain: systematic review of randomised trials*. *Drugs*, 2020. **80**(15): p. 1563-1576.
20. Higgins JPT, Thomas J, Chandler J, Cumpston M, Li T, Page MJ, Welch VA (editors). *Cochrane Handbook for Systematic Reviews of Interventions version 6.3 (updated February 2022)*. *Cochrane*, 2022. Available from [www.training.cochrane.org/handbook](http://www.training.cochrane.org/handbook).
21. Page, M.J., et al., *The PRISMA 2020 statement: an updated guideline for reporting systematic reviews*. *International Journal of Surgery*, 2021. **88**: p. 105906.
22. Sterne, J.A., et al., *RoB 2: a revised tool for assessing risk of bias in randomised trials*. *bmj*, 2019. **366**.
23. Wells, G.A., et al., *The Newcastle-Ottawa Scale (NOS) for assessing the quality of nonrandomised studies in meta-analyses*. 2000, Oxford.
24. Borenstein, M., et al., *A basic introduction to fixed-effect and random-effects models for meta-analysis*. *Research synthesis methods*, 2010. **1**(2): p. 97-111.
25. Higgins, J.P. and S. Green, *Cochrane handbook for systematic reviews of interventions*. 2008.
26. Kontopantelis, E., D.A. Springate, and D. Reeves, *A re-analysis of the Cochrane Library data:*

- the dangers of unobserved heterogeneity in meta-analyses. *PloS one*, 2013. **8**(7): p. e69930.
27. Petropoulou, M. and D. Mavridis, *A comparison of 20 heterogeneity variance estimators in statistical synthesis of results from studies: a simulation study*. *Statistics in medicine*, 2017. **36**(27): p. 4266-4280.
  28. Garland, E.L., et al., *Mindfulness-oriented recovery enhancement reduces opioid dose in primary care by strengthening autonomic regulation during meditation*. *American Psychologist*, 2020. **75**(6): p. 840.
  29. Hudak, J., et al., *Endogenous theta stimulation during meditation predicts reduced opioid dosing following treatment with Mindfulness-Oriented Recovery Enhancement*. *Neuropsychopharmacology*, 2021. **46**(4): p. 836-843.
  30. Sandhu, H.K., et al., *Reducing opioid use for chronic pain with a group-based intervention: a randomized clinical trial*. *JAMA*, 2023. **329**(20): p. 1745-1756.
  31. Sullivan, M.D., et al., *Prescription opioid taper support for outpatients with chronic pain: a randomized controlled trial*. *The journal of pain*, 2017. **18**(3): p. 308-318.
  32. Wartko, P.D., et al., *STRategies to Improve Pain and Enjoy life (STRIFE): results of a pragmatic randomized trial of pain coping skills training and opioid medication taper guidance for patients on long-term opioid therapy*. *Pain*, 2023.
  33. Goodman, M.W., T.P. Guck, and R.M. Teply, *Dialing back opioids for chronic pain one conversation at a time*. *J Fam Pract*, 2018. **67**(12): p. 753-757.
  34. Mehl-Madrona, L., B. Mainguy, and J. Plummer, *Integration of complementary and alternative medicine therapies into primary-care pain management for opiate reduction in a rural setting*. *The Journal of Alternative and Complementary Medicine*, 2016. **22**(8): p. 621-626.
  35. Montgomery, A.D. and R. Ottenbacher, *Battlefield acupuncture for chronic pain management in patients on long-term opioid therapy*. *Medical Acupuncture*, 2020. **32**(1): p. 38-44.
  36. Oldfield, B.J., et al., *Multimodal treatment options, including rotating to buprenorphine, within a multidisciplinary pain clinic for patients on risky opioid regimens: A quality improvement study*. *Pain Medicine*, 2018. **19**(suppl\_1): p. S38-S45.
  37. Seal, K.H., et al., *Opioid reduction and risk mitigation in VA primary care: Outcomes from the integrated pain team initiative*. *Journal of general internal medicine*, 2020. **35**: p. 1238-1244.
  38. Vigil, J.M., et al., *Associations between medical cannabis and prescription opioid use in chronic pain patients: a preliminary cohort study*. *PloS one*, 2017. **12**(11): p. e0187795.
  39. Chou, R., et al., *Best practices, research gaps, and future priorities to support tapering patients on long-term opioid therapy for chronic non-cancer pain in outpatient settings*. *NAM perspectives*, 2020. **2020**.
  40. Hallvik, S.E., et al., *Patient outcomes after opioid dose reduction among patients with chronic opioid therapy*. *Pain*, 2022. **163**(1): p. 83-90.
  41. Metz, V.E., et al., *Prescription opioid dose reductions and potential adverse events: a multi-site observational cohort study in diverse US health systems*. *Journal of general internal medicine*, 2023: p. 1-8.
  42. Garland, E.L., et al., *Mind-body therapies for opioid-treated pain: A systematic review and meta-analysis*. *JAMA internal medicine*, 2020. **180**(1): p. 91-105.
  43. Garland, E.L., E. Thomas, and M.O. Howard, *Mindfulness-oriented recovery enhancement ameliorates the impact of pain on self-reported psychological and physical function among opioid-using chronic pain patients*. *Journal of pain and symptom management*, 2014. **48**(6): p. 1091-1099.
  44. Lewis, P.J., *Uncomfortable Prescribing Decisions in Secondary Care*. 2007, The University of Manchester (United Kingdom): Ann Arbor. p. 302.
  45. Elsharydah, A., J. Wu, and F.C. Li, *Decreasing waiting time for new patients at a community pain clinic*. *Proc (Bayl Univ Med Cent)*, 2022. **35**(3): p. 315-318.
  46. Iversen, L., *Long-term effects of exposure to cannabis*. *Current opinion in Pharmacology*, 2005. **5**(1): p. 69-72.
  47. NICE. *Analgesics*. 2022. Available from: <https://bnf.nice.org.uk/treatment-summaries/analgesics/>. [Cited on 2024 Feb 7th].
